# Supplementary material for: Trends in Racial-Ethnic Disparities in Adult Mental Health Treatment Use From 2005 to 2019
Source: Atypon-hosted journal article supplement (doi:10.1176/appi.ps.202100700), 2022-11-02
Supplement: appi.ps.202100700.ds001.pdf [file appi.ps.202100700.ds001.pdf]

Supplemental Table 1. Sociodemographic characteristics among adults 18 and older with major depressive episode from 2005 to 2019

| Variable (% , SE)            | Asian/PI/Native HI |            | Black/AA   |            | Hispanic   |            | More than one race |            | Native American/Alaska Native |             | White      |            |
|------------------------------|--------------------|------------|------------|------------|------------|------------|--------------------|------------|-------------------------------|-------------|------------|------------|
|                              | 2005               | 2019       | 2005       | 2019       | 2005       | 2019       | 2005               | 2019       | 2005                          | 2019        | 2005       | 2019       |
| Sex                          |                    |            |            |            |            |            |                    |            |                               |             |            |            |
| Female                       | 51.5 (10.3)        | 71.8 (4.9) | 74.3 (4.1) | 69.4 (2.8) | 64.8 (4.7) | 62.7 (3.1) | 51.9 (9.1)         | 66.6 (5.1) | 81.0 (7.6)                    | 59.4 (12.0) | 66.2 (1.4) | 61.3 (1.2) |
| Male                         | 48.5 (10.3)        | 28.2 (4.9) | 25.7 (4.1) | 30.6 (2.8) | 35.2 (4.7) | 37.3 (3.1) | 48.1 (9.1)         | 33.4 (5.1) | 19.0 (7.6)                    | 40.6 (12.0) | 33.8 (1.4) | 38.7 (1.2) |
| Age                          |                    |            |            |            |            |            |                    |            |                               |             |            |            |
| 18-25                        | 31.2 (8.4)         | 35.3 (5.1) | 20.2 (2.4) | 27.3 (2.7) | 26.8 (3.3) | 33.5 (2.5) | 23.7 (4.5)         | 33.9 (4.7) | 23.8 (7.0)                    | 27.9 (7.8)  | 19.0 (1.0) | 23.8 (0.9) |
| 26-34                        | 26.1 (10.0)        | 31.5 (6.1) | 22.7 (4.3) | 23.3 (2.5) | 30.0 (4.1) | 24.3 (2.9) | 18.6 (6.0)         | 30.7 (5.6) | 28.7 (9.3)                    | 9.1 (3.7)   | 15.6 (1.1) | 20.8 (0.9) |
| 35-49                        | 29.3 (11.7)        | 13.5 (3.5) | 31.3 (4.3) | 25.9 (2.8) | 26.6 (5.1) | 24.7 (2.6) | 40.6 (8.8)         | 18.1 (4.1) | 46.0 (10.2)                   | 12.1 (5.6)  | 36.5 (1.5) | 24.3 (1.1) |
| 50-64                        | 10.8 (4.2)         | 12.3 (6.4) | 19.9 (5.2) | 19.1 (3.1) | 13.1 (3.7) | 10.9 (2.2) | 9.1 (6.3)          | 12.9 (4.9) | 1.0 (1.0)                     | 45.7 (12.5) | 23.1 (1.8) | 20.7 (1.0) |
| 65 or older                  | 2.6 (2.6)          | 7.3 (4.9)  | 5.9 (4.9)  | 4.4 (1.8)  | 3.6 (2.2)  | 6.5 (2.2)  | 8.1 (5.5)          | 4.5 (2.4)  | 0.6 (0.6)                     | 5.1 (5.0)   | 5.8 (1.1)  | 10.3 (1.2) |
| Educational attainment       |                    |            |            |            |            |            |                    |            |                               |             |            |            |
| High school but not college  | 14.0 (4.5)         | 8.6 (2.8)  | 34.8 (4.5) | 24.4 (3.2) | 28.8 (3.4) | 22.7 (2.5) | 32.7 (7.9)         | 25.0 (4.4) | 25.5 (7.4)                    | 43.1 (12.0) | 33.4 (1.9) | 21.7 (1.0) |
| Less than high school        | 8.2 (3.5)          | 4.6 (2.5)  | 11.3 (2.5) | 13.7 (2.1) | 32.7 (5.7) | 14.5 (2.4) | 15.8 (6.7)         | 13.8 (4.4) | 26.0 (8.0)                    | 8.8 (5.4)   | 12.9 (1.2) | 7.0 (0.6)  |
| Some college or college grad | 77.7 (6.2)         | 86.8 (3.1) | 53.9 (4.4) | 61.8 (3.7) | 38.5 (5.2) | 62.8 (3.1) | 51.5 (8.4)         | 61.3 (5.4) | 48.6 (9.2)                    | 48.0 (11.6) | 53.7 (1.8) | 71.3 (1.2) |
| Employment                   |                    |            |            |            |            |            |                    |            |                               |             |            |            |
| employed full-time           | 58.0 (10.0)        | 38.4 (5.5) | 42.2 (4.8) | 44.0 (3.7) | 49.8 (4.9) | 45.4 (2.7) | 45.0 (9.4)         | 32.2 (4.4) | 46.8 (12.0)                   | 49.2 (11.8) | 47.1 (1.8) | 45.6 (1.5) |
| employed part-time           | 22.4 (8.4)         | 17.0 (3.5) | 5.3 (1.0)  | 15.8 (2.6) | 15.8 (3.2) | 19.0 (2.3) | 10.9 (3.6)         | 22.7 (3.8) | 26.3 (10.7)                   | 6.2 (3.0)   | 15.1 (1.0) | 15.8 (1.1) |
| other                        | 10.3 (4.6)         | 39.5 (6.8) | 38.9 (5.3) | 33.3 (3.6) | 26.0 (4.9) | 28.6 (3.3) | 34.1 (8.4)         | 34.7 (5.2) | 24.5 (8.9)                    | 39.7 (11.3) | 32.6 (1.7) | 33.5 (1.1) |
| unemployed                   | 9.4 (4.3)          | 5.2 (2.1)  | 13.6 (3.2) | 6.9 (1.6)  | 8.4 (2.0)  | 7.1 (1.3)  | 9.9 (5.0)          | 10.4 (4.4) | 2.4 (1.4)                     | 4.9 (4.0)   | 5.1 (0.6)  | 5.0 (0.4)  |
| Income                       |                    |            |            |            |            |            |                    |            |                               |             |            |            |
| \$0-19,999                   | 16.2 (6.3)         | 16.4 (3.5) | 38.3 (4.6) | 39.5 (3.3) | 36.4 (4.3) | 18.5 (2.2) | 38.9 (8.5)         | 32.5 (5.9) | 44.6 (9.7)                    | 42.9 (12.0) | 26.8 (1.4) | 19.9 (1.1) |
| \$20,000-49,999              | 51.7 (10.9)        | 24.9 (5.8) | 45.8 (5.7) | 28.0 (2.7) | 43.0 (4.2) | 36.2 (2.8) | 36.1 (8.8)         | 31.4 (6.0) | 26.9 (9.8)                    | 23.8 (9.2)  | 33.7 (1.7) | 30.2 (1.3) |
| \$50,000-74,999              | 9.7 (4.1)          | 20.2 (4.4) | 9.1 (2.7)  | 12.1 (2.3) | 11.3 (2.2) | 18.7 (2.4) | 3.2 (1.8)          | 10.4 (3.2) | 23.3 (11.4)                   | 25.0 (12.6) | 18.3 (1.3) | 15.7 (1.1) |
| \$75,000+                    | 22.5 (11.4)        | 38.5 (5.9) | 6.9 (1.9)  | 20.4 (2.7) | 9.2 (2.4)  | 26.7 (2.9) | 21.8 (8.7)         | 25.6 (4.3) | 5.1 (4.0)                     | 8.2 (5.3)   | 21.2 (1.7) | 34.2 (1.1) |
| Insurance                    |                    |            |            |            |            |            |                    |            |                               |             |            |            |
| Public insurance             | 10.6 (4.5)         | 11.5 (3.1) | 23.5 (3.8) | 27.3 (3.0) | 14.6 (4.3) | 21.9 (2.1) | 11.1 (4.7)         | 28.2 (6.1) | 17.8 (8.6)                    | 10.7 (3.7)  | 10.3 (0.9) | 14.9 (0.9) |
| No insurance                 | 21.1 (6.1)         | 9.6 (3.5)  | 17.9 (3.6) | 11.4 (1.8) | 33.4 (3.6) | 15.1 (1.8) | 22.2 (5.7)         | 12.2 (3.1) | 24.5 (8.4)                    | 8.5 (5.0)   | 16.9 (1.0) | 10.0 (0.8) |
| Other                        | 13.4 (7.7)         | 12.0 (5.0) | 24.9 (5.7) | 16.7 (3.3) | 8.5 (2.5)  | 14.3 (3.3) | 17.4 (7.5)         | 9.9 (3.0)  | 14.6 (5.0)                    | 33.4 (11.1) | 11.6 (1.2) | 12.6 (0.9) |
| Private insurance            | 54.9 (9.9)         | 66.8 (6.6) | 33.7 (4.1) | 44.7 (2.8) | 43.4 (4.4) | 48.7 (2.8) | 49.3 (9.2)         | 49.7 (5.9) | 43.1 (11.7)                   | 47.5 (12.4) | 61.3 (1.4) | 62.4 (1.3) |

Note: Asian/Pacific Islander/Native Hawaiian (Asian/PI/Native HI), Black/African American (Black/AA), Native American/Alaska Native (Native Am/AK Native).

Supplemental Table 2. Sociodemographic characteristics among adults 18 and older with serious psychological distress from 2005 to 2019

| Variable (% , SE)            | Asian/PI/Native HI |            | Black/AA   |            | Hispanic   |            | More than one race |            | Native American/Alaska Native |             | White      |            |
|------------------------------|--------------------|------------|------------|------------|------------|------------|--------------------|------------|-------------------------------|-------------|------------|------------|
|                              | 2005               | 2019       | 2005       | 2019       | 2005       | 2019       | 2005               | 2019       | 2005                          | 2019        | 2005       | 2019       |
| Sex                          |                    |            |            |            |            |            |                    |            |                               |             |            |            |
| Female                       | 47.3 (5.7)         | 62.0 (3.6) | 70.7 (3.1) | 63.1 (2.0) | 59.5 (3.2) | 57.5 (2.4) | 61.8 (6.9)         | 61.3 (3.8) | 79.2 (7.6)                    | 60.0 (9.7)  | 65.0 (1.3) | 61.6 (1.1) |
| Male                         | 52.7 (5.7)         | 38.0 (3.6) | 29.3 (3.1) | 36.9 (2.0) | 40.5 (3.2) | 42.5 (2.4) | 38.2 (6.9)         | 38.7 (3.8) | 20.8 (7.6)                    | 40.0 (9.7)  | 35.0 (1.3) | 38.4 (1.1) |
| Age                          |                    |            |            |            |            |            |                    |            |                               |             |            |            |
| 18-25                        | 39.3 (7.2)         | 36.5 (2.9) | 26.7 (2.3) | 29.9 (1.8) | 31.1 (2.1) | 37.3 (1.7) | 26.1 (4.6)         | 35.9 (3.9) | 16.6 (4.9)                    | 29.2 (6.8)  | 24.5 (0.9) | 26.9 (0.9) |
| 26-34                        | 19.2 (5.1)         | 32.9 (3.9) | 18.2 (2.7) | 26.0 (2.0) | 29.7 (2.8) | 26.2 (1.9) | 23.3 (5.2)         | 26.8 (4.3) | 36.5 (9.7)                    | 15.8 (4.7)  | 16.8 (0.9) | 23.5 (0.7) |
| 35-49                        | 25.0 (7.2)         | 13.2 (3.4) | 30.4 (3.3) | 25.0 (2.0) | 25.9 (2.8) | 21.2 (1.9) | 23.1 (5.9)         | 22.5 (3.2) | 27.8 (6.8)                    | 23.3 (6.7)  | 34.9 (1.5) | 24.4 (0.9) |
| 50-64                        | 9.2 (4.4)          | 7.6 (4.3)  | 15.8 (3.8) | 14.8 (2.4) | 7.4 (1.9)  | 11.1 (1.9) | 15.4 (7.7)         | 9.4 (3.2)  | 15.5 (9.6)                    | 29.5 (11.3) | 16.6 (1.5) | 17.2 (1.0) |
| 65 or older                  | 7.3 (5.4)          | 9.7 (3.9)  | 8.9 (3.2)  | 4.4 (1.3)  | 5.9 (2.0)  | 4.2 (1.3)  | 12.1 (6.3)         | 5.4 (2.7)  | 3.7 (3.3)                     | 2.2 (2.2)   | 7.2 (0.9)  | 8.1 (0.7)  |
| Educational attainment       |                    |            |            |            |            |            |                    |            |                               |             |            |            |
| High school but not college  | 12.4 (3.6)         | 14.4 (2.9) | 32.0 (2.7) | 29.3 (2.1) | 26.0 (2.5) | 27.8 (2.0) | 27.0 (5.9)         | 24.3 (3.7) | 24.2 (6.9)                    | 32.2 (9.7)  | 32.2 (1.3) | 24.7 (0.9) |
| Less than high school        | 8.5 (3.1)          | 10.3 (2.9) | 25.4 (3.3) | 18.0 (1.5) | 37.4 (3.7) | 18.9 (1.6) | 23.8 (6.7)         | 12.0 (2.6) | 31.9 (8.6)                    | 24.0 (6.9)  | 16.1 (1.0) | 9.8 (0.6)  |
| Some college or college grad | 79.1 (4.9)         | 75.3 (4.7) | 42.6 (3.2) | 52.7 (2.2) | 36.6 (3.6) | 53.3 (2.1) | 49.2 (7.1)         | 63.7 (3.9) | 43.9 (10.5)                   | 43.8 (9.4)  | 51.7 (1.4) | 65.5 (1.1) |
| Employment                   |                    |            |            |            |            |            |                    |            |                               |             |            |            |
| employed full-time           | 53.0 (8.3)         | 41.8 (4.5) | 36.4 (3.4) | 42.4 (2.9) | 52.8 (3.1) | 47.4 (1.9) | 43.7 (7.9)         | 39.0 (3.3) | 46.8 (9.4)                    | 43.9 (9.7)  | 48.5 (1.3) | 47.8 (1.3) |
| employed part-time           | 21.6 (5.1)         | 21.2 (3.1) | 11.5 (1.4) | 13.4 (1.3) | 11.8 (1.8) | 17.6 (1.9) | 10.6 (3.1)         | 21.8 (2.1) | 27.5 (9.3)                    | 8.4 (3.1)   | 15.3 (0.7) | 15.9 (0.9) |
| other                        | 20.7 (6.1)         | 27.8 (4.6) | 41.4 (4.2) | 30.3 (2.3) | 26.1 (3.2) | 26.8 (2.2) | 41.8 (7.7)         | 29.2 (3.3) | 21.0 (6.4)                    | 43.3 (9.5)  | 31.6 (1.2) | 30.9 (1.2) |
| unemployed                   | 4.7 (2.3)          | 9.2 (2.5)  | 10.8 (1.8) | 13.9 (1.7) | 9.2 (1.5)  | 8.3 (1.0)  | 4.0 (1.5)          | 10.0 (2.9) | 4.8 (1.9)                     | 4.4 (2.1)   | 4.6 (0.5)  | 5.4 (0.4)  |
| Income                       |                    |            |            |            |            |            |                    |            |                               |             |            |            |
| \$0-19,999                   | 22.6 (5.1)         | 15.7 (2.4) | 43.6 (3.5) | 36.6 (2.1) | 34.3 (2.5) | 22.6 (1.6) | 44.4 (8.0)         | 26.9 (4.5) | 53.0 (10.5)                   | 44.4 (9.3)  | 27.0 (1.2) | 21.6 (0.9) |
| \$20,000-49,999              | 33.5 (5.7)         | 29.3 (4.0) | 41.5 (3.9) | 33.5 (2.2) | 43.2 (3.3) | 37.2 (2.1) | 31.3 (7.0)         | 34.5 (3.8) | 28.0 (7.8)                    | 34.4 (8.5)  | 34.4 (1.2) | 30.0 (0.9) |
| \$50,000-74,999              | 18.5 (5.1)         | 16.1 (2.5) | 7.3 (1.6)  | 12.7 (1.5) | 10.3 (1.7) | 17.5 (1.7) | 5.2 (2.2)          | 12.1 (2.1) | 14.1 (6.1)                    | 16.3 (10.0) | 17.3 (1.1) | 14.7 (0.6) |
| \$75,000+                    | 25.4 (5.6)         | 38.8 (4.6) | 7.7 (1.4)  | 17.3 (2.0) | 12.1 (2.8) | 22.7 (1.7) | 19.2 (7.2)         | 26.5 (3.3) | 4.9 (3.2)                     | 4.8 (2.2)   | 21.3 (1.5) | 33.7 (1.0) |
| Insurance                    |                    |            |            |            |            |            |                    |            |                               |             |            |            |
| Public insurance             | 2.8 (1.1)          | 14.7 (2.2) | 21.6 (2.3) | 29.3 (2.2) | 16.6 (2.6) | 24.4 (2.1) | 12.3 (4.7)         | 23.2 (4.4) | 24.7 (9.5)                    | 21.7 (6.4)  | 10.6 (0.9) | 15.9 (0.6) |
| No insurance                 | 14.6 (3.8)         | 10.8 (2.8) | 16.9 (2.1) | 13.6 (1.4) | 34.8 (2.9) | 19.6 (1.4) | 21.8 (5.0)         | 10.3 (2.4) | 13.1 (4.6)                    | 9.4 (4.3)   | 19.6 (1.0) | 11.5 (0.6) |
| Other                        | 12.4 (4.7)         | 10.2 (3.2) | 26.8 (4.1) | 14.8 (1.8) | 8.5 (1.9)  | 10.2 (1.4) | 19.5 (6.8)         | 13.1 (1.8) | 20.5 (7.1)                    | 32.0 (9.6)  | 9.7 (1.0)  | 13.4 (0.6) |
| Private insurance            | 70.2 (6.1)         | 64.2 (4.5) | 34.7 (3.2) | 42.3 (2.3) | 40.0 (2.5) | 45.8 (2.2) | 46.4 (8.1)         | 53.4 (4.1) | 41.7 (10.9)                   | 37.0 (9.8)  | 60.1 (1.3) | 59.2 (0.9) |

Note: Asian/Pacific Islander/Native Hawaiian (Asian/PI/Native HI), Black/African American (Black/AA), Native American/Alaska Native (Native Am/AK Native).

Supplemental Table 3. Sociodemographic characteristics among adults 18 and older with severe mental illness from 2008 to 2019

| Variable (% , SE)            | Asian/PI/Native HI |            | Black/AA   |            | Hispanic   |            | More than one race |            | Native American/Alaska Native |             | White      |            |
|------------------------------|--------------------|------------|------------|------------|------------|------------|--------------------|------------|-------------------------------|-------------|------------|------------|
|                              | 2008               | 2019       | 2008       | 2019       | 2008       | 2019       | 2008               | 2019       | 2008                          | 2019        | 2008       | 2019       |
| Sex                          |                    |            |            |            |            |            |                    |            |                               |             |            |            |
| Female                       | 68.9 (14.2)        | 73.5 (6.1) | 62.8 (6.5) | 68.7 (3.9) | 65.4 (5.8) | 58.4 (4.4) | 69.3 (13.5)        | 72.0 (5.0) | 62.7 (13.9)                   | 59.4 (15.2) | 66.4 (2.2) | 64.6 (1.6) |
| Male                         | 31.1 (14.2)        | 26.5 (6.1) | 37.2 (6.5) | 31.3 (3.9) | 34.6 (5.8) | 41.6 (4.4) | 30.7 (13.5)        | 28.0 (5.0) | 37.3 (13.9)                   | 40.6 (15.2) | 33.6 (2.2) | 35.4 (1.6) |
| Age                          |                    |            |            |            |            |            |                    |            |                               |             |            |            |
| 18-25                        | 22.4 (8.0)         | 30.6 (6.0) | 19.1 (3.7) | 23.3 (3.0) | 30.9 (4.4) | 26.1 (2.3) | 21.7 (8.0)         | 25.2 (4.2) | 24.4 (12.8)                   | 19.6 (8.6)  | 12.2 (0.8) | 21.4 (1.1) |
| 26-34                        | 14.4 (9.1)         | 32.3 (6.3) | 33.2 (8.3) | 21.6 (3.2) | 23.8 (4.8) | 25.2 (2.2) | 18.5 (6.2)         | 30.8 (5.3) | 33.2 (14.2)                   | 14.9 (6.5)  | 17.6 (1.4) | 23.4 (1.2) |
| 35-49                        | 20.7 (11.4)        | 19.0 (5.5) | 34.8 (6.0) | 33.1 (3.9) | 21.8 (4.4) | 29.2 (3.3) | 48.4 (10.1)        | 24.1 (5.0) | 29.2 (10.2)                   | 21.3 (9.0)  | 40.1 (2.4) | 28.1 (1.4) |
| 50-64                        | 42.5 (19.3)        | 7.3 (6.7)  | 12.4 (5.2) | 20.8 (4.2) | 18.5 (5.3) | 15.3 (3.6) | 0.9 (1.0)          | 14.2 (5.6) | 13.2 (11.9)                   | 44.2 (15.8) | 23.2 (2.6) | 19.7 (1.4) |
| 65 or older                  | 22.4 (8.0)         | 10.8 (6.8) | 0.5 (0.5)  | 1.3 (1.3)  | 5.0 (4.9)  | 4.1 (1.9)  | 10.5 (7.9)         | 5.7 (3.8)  | 24.4 (12.8)                   | 19.6 (8.6)  | 6.8 (1.5)  | 7.4 (1.0)  |
| Educational attainment       |                    |            |            |            |            |            |                    |            |                               |             |            |            |
| High school but not college  | 35.1 (16.6)        | 10.0 (3.4) | 34.9 (6.0) | 28.8 (3.3) | 32.7 (6.5) | 25.2 (3.6) | 52.2 (15.4)        | 24.4 (4.8) | 19.3 (6.1)                    | 36.6 (15.7) | 32.8 (2.5) | 22.3 (1.1) |
| Less than high school        | 0.8 (0.8)          | 3.8 (3.4)  | 18.4 (3.6) | 12.0 (2.3) | 21.6 (5.0) | 14.2 (2.8) | 11.4 (5.7)         | 17.2 (5.3) | 23.3 (9.2)                    | 11.0 (7.5)  | 13.1 (1.5) | 7.5 (0.7)  |
| Some college or college grad | 64.1 (16.6)        | 86.2 (4.6) | 46.7 (5.7) | 59.3 (3.6) | 45.7 (6.5) | 60.6 (3.8) | 11.4 (5.7)         | 58.4 (5.8) | 57.5 (12.6)                   | 52.3 (15.1) | 54.1 (2.7) | 70.1 (1.4) |
| Employment                   |                    |            |            |            |            |            |                    |            |                               |             |            |            |
| employed full-time           | 55.0 (16.6)        | 36.8 (6.9) | 35.5 (6.8) | 43.0 (4.5) | 34.6 (5.1) | 46.8 (3.4) | 10.7 (4.4)         | 35.9 (4.9) | 18.6 (9.7)                    | 47.0 (14.9) | 43.3 (2.6) | 44.0 (1.8) |
| employed part-time           | 7.1 (3.7)          | 16.7 (4.7) | 13.1 (2.9) | 16.4 (2.7) | 19.4 (5.4) | 19.0 (3.4) | 25.6 (7.0)         | 13.6 (3.1) | 7.6 (5.1)                     | 6.9 (4.0)   | 13.4 (1.8) | 15.7 (1.3) |
| other                        | 36.3 (17.6)        | 38.7 (8.4) | 38.5 (6.9) | 31.0 (3.7) | 41.6 (5.8) | 27.7 (3.7) | 61.1 (8.0)         | 41.3 (6.0) | 45.0 (15.4)                   | 41.9 (14.5) | 35.7 (2.5) | 34.3 (1.3) |
| unemployed                   | 1.6 (1.6)          | 7.9 (3.3)  | 12.9 (4.6) | 9.6 (2.0)  | 4.4 (1.4)  | 6.5 (1.5)  | 2.6 (1.7)          | 9.2 (4.9)  | 28.9 (13.0)                   | 4.2 (3.4)   | 7.6 (1.0)  | 6.1 (0.6)  |
| Income                       |                    |            |            |            |            |            |                    |            |                               |             |            |            |
| \$0-19,999                   | 10.7 (5.2)         | 18.6 (4.4) | 42.7 (6.6) | 37.2 (3.7) | 31.1 (5.5) | 20.4 (3.1) | 39.2 (14.7)        | 32.4 (6.2) | 40.6 (14.4)                   | 46.0 (14.5) | 23.5 (1.9) | 23.4 (1.4) |
| \$20,000-49,999              | 53.2 (17.6)        | 27.1 (7.5) | 40.9 (7.4) | 28.0 (3.3) | 37.0 (5.9) | 34.2 (4.2) | 43.6 (11.6)        | 34.6 (5.7) | 45.8 (14.8)                   | 21.4 (9.0)  | 34.1 (2.0) | 31.2 (1.3) |
| \$50,000-74,999              | 29.6 (18.1)        | 17.7 (5.1) | 13.3 (3.5) | 13.4 (3.2) | 13.8 (4.3) | 19.8 (2.9) | 5.1 (2.5)          | 10.6 (3.1) | 12.3 (8.5)                    | 28.3 (16.3) | 21.5 (2.2) | 13.9 (1.1) |
| \$75,000+                    | 6.5 (4.9)          | 36.6 (8.3) | 3.2 (1.6)  | 21.5 (3.7) | 18.1 (4.2) | 25.7 (3.2) | 12.2 (5.2)         | 22.5 (4.8) | 1.2 (1.1)                     | 4.3 (2.5)   | 20.9 (2.2) | 31.6 (1.4) |
| Insurance                    |                    |            |            |            |            |            |                    |            |                               |             |            |            |
| Public insurance             | 4.2 (3.3)          | 14.2 (4.1) | 29.5 (5.8) | 24.0 (4.7) | 19.9 (4.6) | 25.1 (3.9) | 19.1 (6.5)         | 30.9 (5.9) | 19.4 (13.4)                   | 10.0 (4.6)  | 10.4 (1.4) | 18.2 (1.2) |
| No insurance                 | 7.2 (3.7)          | 7.5 (2.3)  | 20.2 (4.2) | 13.0 (2.4) | 24.1 (5.3) | 13.5 (2.0) | 10.0 (5.1)         | 13.6 (4.2) | 21.2 (9.6)                    | 10.4 (6.8)  | 19.5 (1.7) | 11.4 (0.9) |
| Other                        | 1.9 (1.4)          | 16.3 (6.7) | 13.2 (4.6) | 18.4 (3.9) | 14.8 (4.1) | 12.7 (3.4) | 32.5 (13.7)        | 13.6 (4.3) | 27.3 (12.7)                   | 35.1 (14.1) | 13.9 (1.7) | 13.6 (1.1) |
| Private insurance            | 86.7 (5.8)         | 62.1 (8.5) | 37.1 (6.5) | 44.6 (4.4) | 41.3 (5.9) | 48.8 (3.9) | 38.4 (10.3)        | 41.9 (5.7) | 32.1 (14.8)                   | 44.5 (15.2) | 56.1 (2.5) | 56.8 (1.5) |

Note: Asian/Pacific Islander/Native Hawaiian (Asian/PI/Native HI), Black/African American (Black/AA), Native American/Alaska Native (Native Am/AK Native).

Supplemental Figure 1. Prevalence of major depressive episode, serious psychological distress and severe mental illness in the past year among adults 18 and older in the 2005-2019 NSDUH

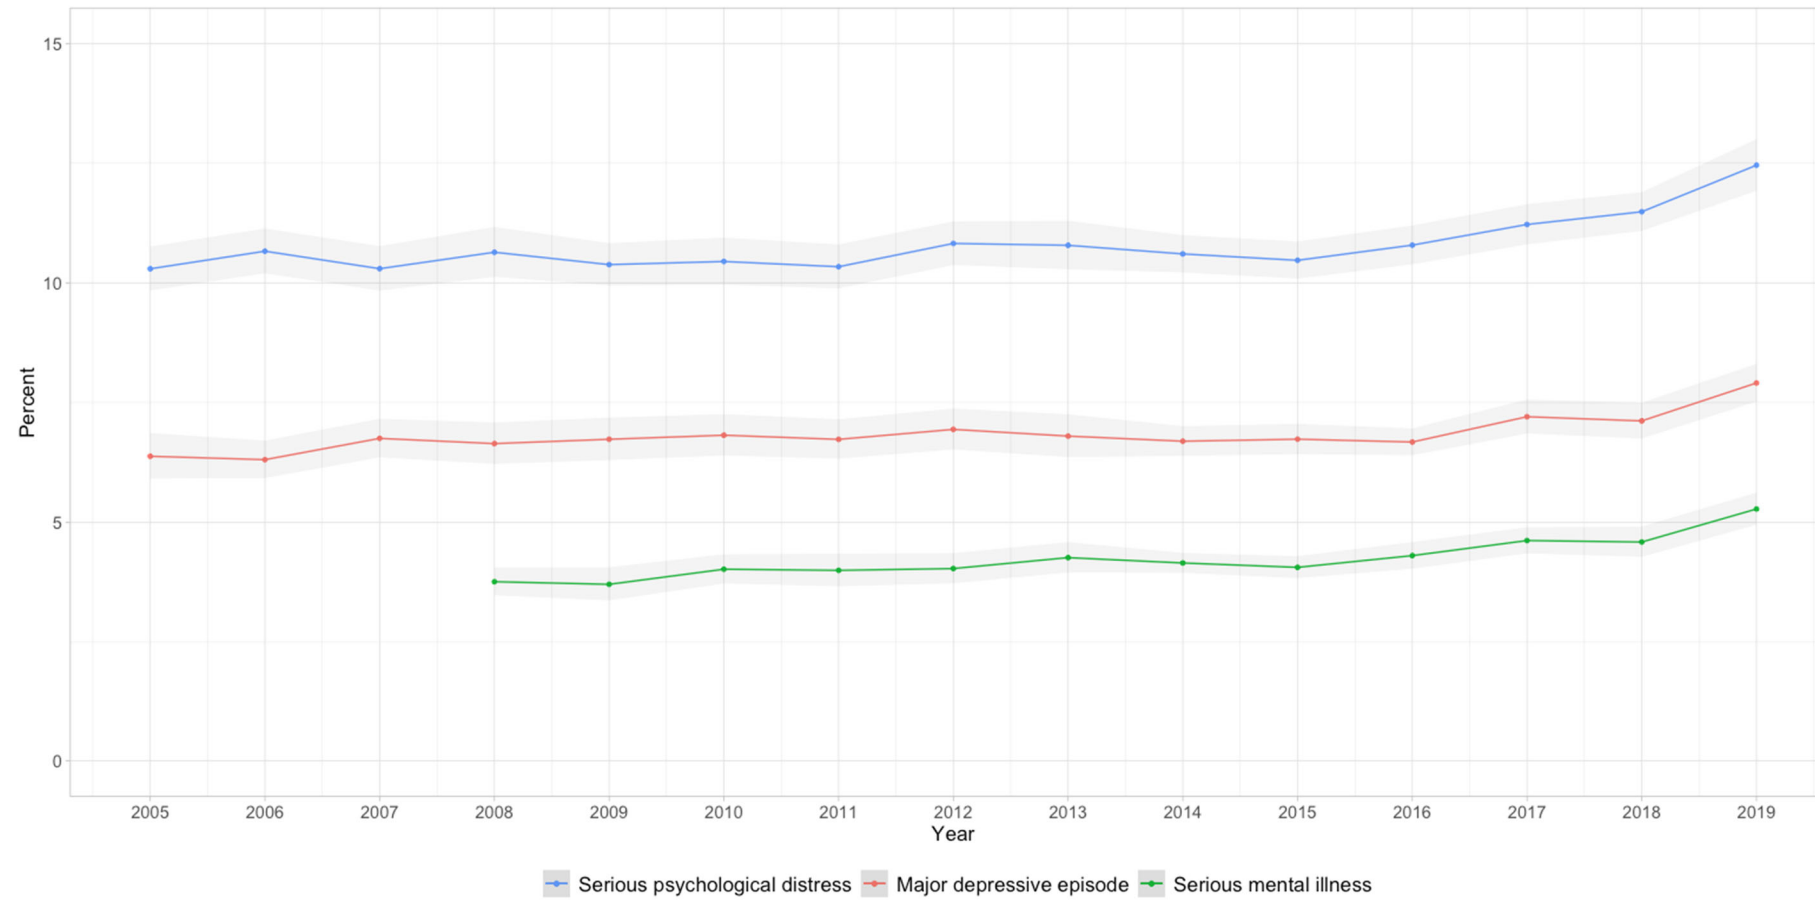

Note: The shading around the curves represents the 95% CI.

Supplemental Figure 2. Prevalence of past-year major depressive episode among adults 18 and older by race and ethnicity, NSDUH 2005-2019

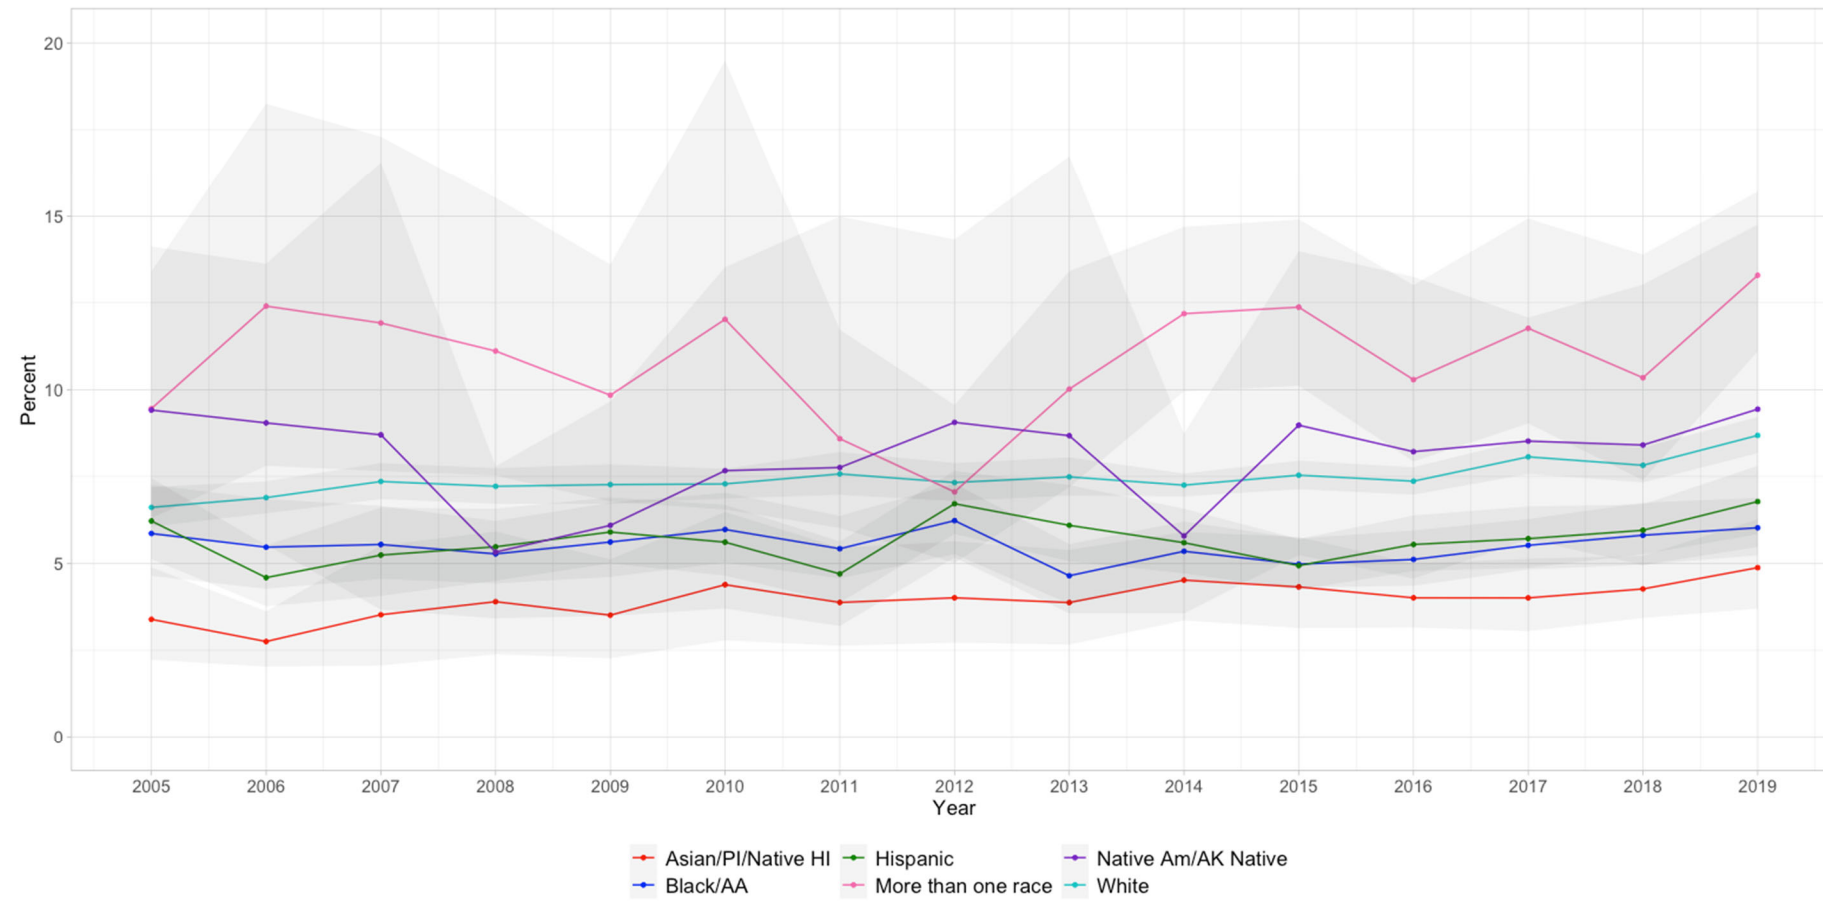

Note: The shading around the curves represents the 95% CI. Asian/Pacific Islander/Native Hawaiian (Asian/PI/Native HI), Black/African American (Black/AA), Native American/Alaska Native (Native Am/AK Native).

Supplemental Figure 3. Prevalence of past-year serious psychological distress among adults 18 and older by race and ethnicity, NSDUH 2005-2019

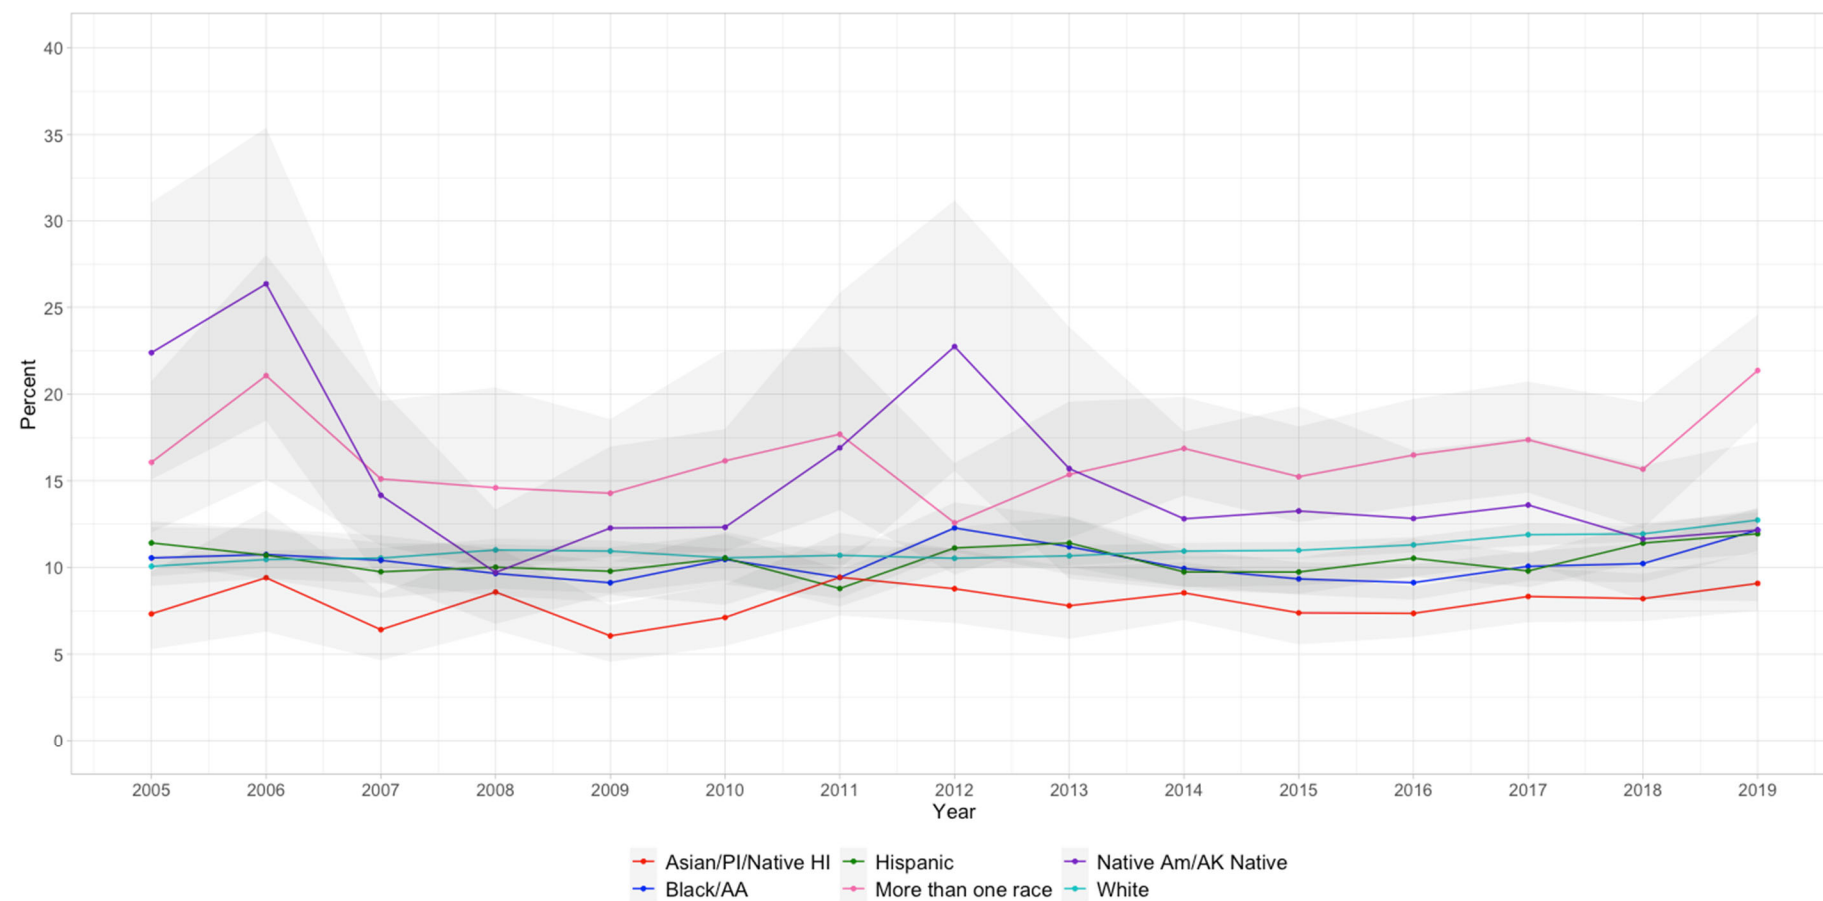

Note: The shading around the curves represents the 95% CI. Asian/Pacific Islander/Native Hawaiian (Asian/PI/Native HI), Black/African American (Black/AA), Native American/Alaska Native (Native Am/AK Native).

Supplemental Figure 4. Prevalence of past-year severe mental illness among adults 18 and older by race and ethnicity, NSDUH 2005-2019

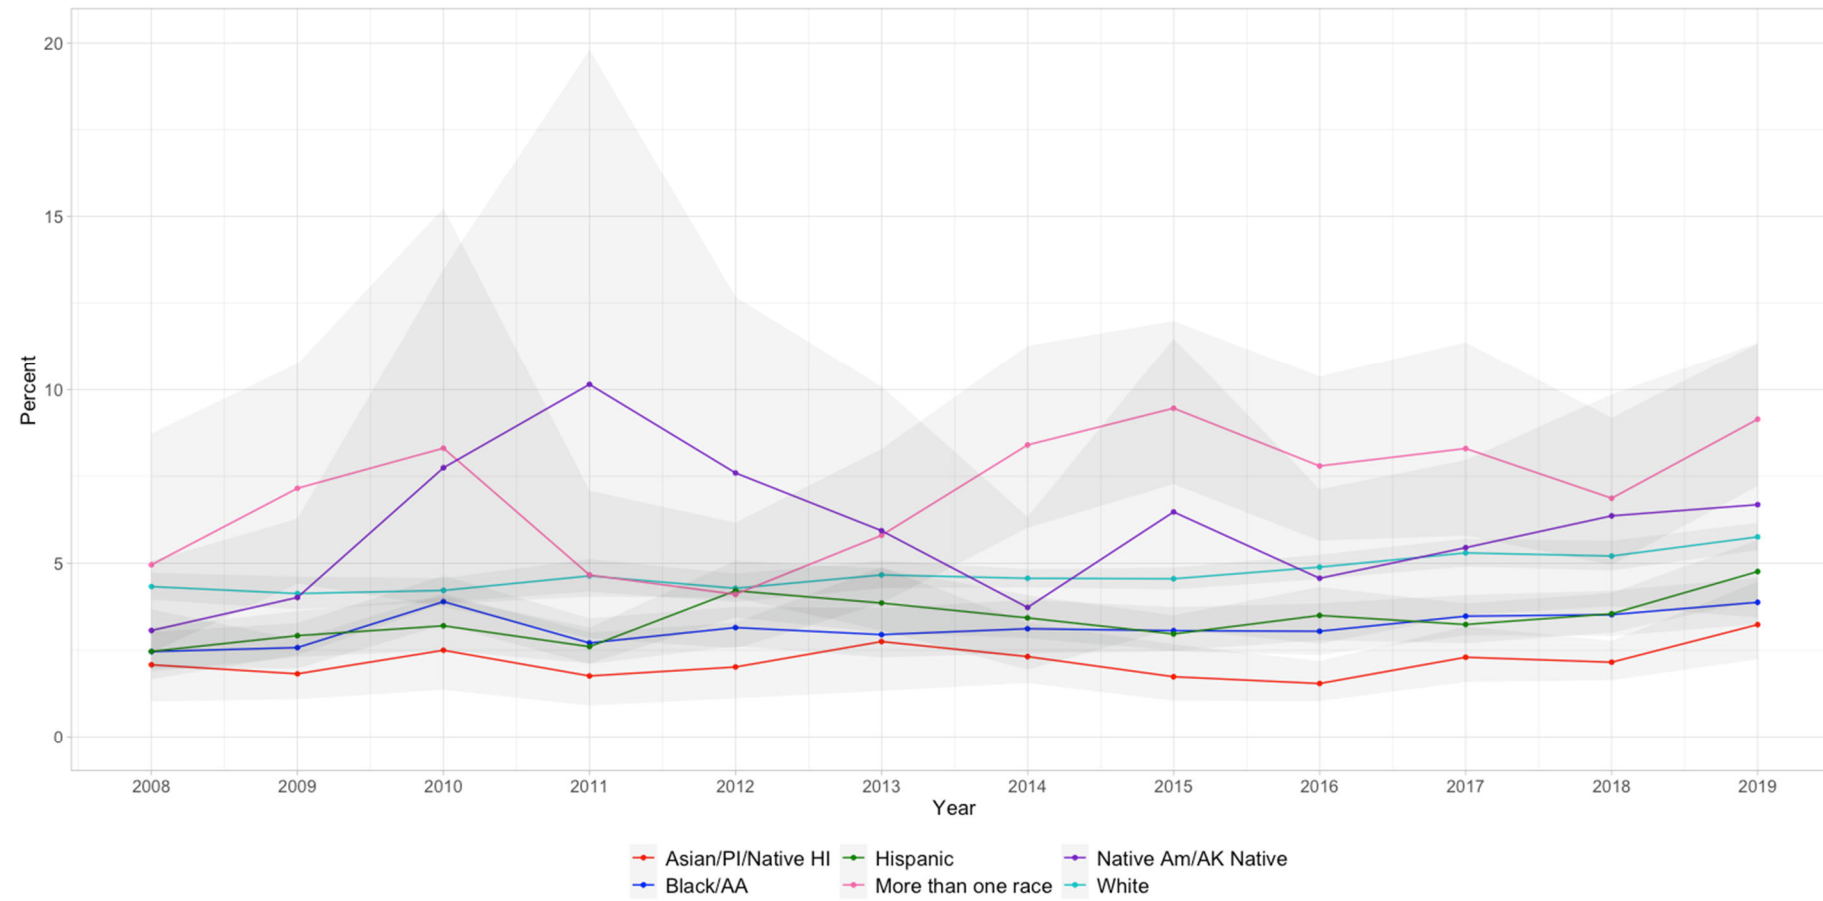

Note: The shading around the curves represents the 95% CI. Asian/Pacific Islander/Native Hawaiian (Asian/PI/Native HI), Black/African American (Black/AA), Native American/Alaska Native (Native Am/AK Native).

Supplemental Table 4. Trends in past-year any mental health treatment among those with past-year major depressive episode, serious psychological distress, and severe mental illness among adults 18 and older by racial/ethnic group, NSDUH 2005/2008 versus 2019

| Race/ethnicity                         |                               | Major depressive episode |              |                          |                           | Serious psychological distress |              |                          |                           | Severe mental illness |              |                          |                           |
|----------------------------------------|-------------------------------|--------------------------|--------------|--------------------------|---------------------------|--------------------------------|--------------|--------------------------|---------------------------|-----------------------|--------------|--------------------------|---------------------------|
|                                        |                               | 2005                     | 2019         | Difference between years | Difference in disparities | 2005                           | 2019         | Difference between years | Difference in disparities | 2008                  | 2019         | Difference between years | Difference in disparities |
| White                                  | % <sup>a</sup> (SE)           | 57.7 (2)                 | 63.3 (1.1)   | 5.6* (2.3)               |                           | 50.4 (1.5)                     | 55.3 (1.1)   | 4.9* (1.9)               |                           | 67.9 (2.6)            | 69.8 (1.3)   | 1.8 (3)                  |                           |
| Asian/Pacific Islander/Native Hawaiian | % <sup>a</sup> (SE)           | 40.8 (11.5)              | 44 (6.7)     | 3.3 (13.3)               |                           | 20.9 (5.8)                     | 30.6 (4.4)   | 9.6 (7.3)                |                           | 61.2 (15.2)           | 49.9 (8.3)   | -11.3 (17.3)             |                           |
|                                        | Disparity % <sup>b</sup> (SE) | -16.9 (11.9)             | -19.2* (7.1) |                          | -2.3 (13.8)               | -29.5* (6.5)                   | -24.8* (4.6) |                          | 4.7 (8)                   | -6.7 (15.4)           | -19.9* (8.5) |                          | -13.1 (17.6)              |
| Black/African American                 | % <sup>a</sup> (SE)           | 42.9 (5.2)               | 43 (3.7)     | 0.1 (6.3)                |                           | 36.2 (3.6)                     | 35 (2.6)     | -1.1 (4.5)               |                           | 58.6 (5.7)            | 55.8 (4)     | -2.8 (7)                 |                           |
|                                        | Disparity % <sup>b</sup> (SE) | -14.7* (5.6)             | -20.3* (3.8) |                          | -5.5 (6.8)                | -14.2* (4)                     | -20.3* (2.9) |                          | -6 (4.9)                  | -9.3 (5.9)            | -14.0* (4.3) |                          | -4.7 (7.3)                |
| Hispanic                               | % <sup>a</sup> (SE)           | 32.6 (3.1)               | 48.3 (3)     | 15.8 (4.4)               |                           | 28.5 (2.8)                     | 34.8 (2.2)   | 6.3 (3.5)                |                           | 47.7 (6.2)            | 51.7 (4.1)   | 3.9 (7.5)                |                           |
|                                        | Disparity % <sup>b</sup> (SE) | -25.1* (3.6)             | -14.9* (3.4) |                          | 10.2* (5)                 | -21.9* (2.9)                   | -20.6* (2.4) |                          | 1.3 (3.8)                 | -20.2* (6.6)          | -18.1* (4.4) |                          | 2.1 (7.9)                 |
| More than one race                     | % <sup>a</sup> (SE)           | 38.5 (8.5)               | 56.1 (5.1)   | 17.5 (9.9)               |                           | 38.2 (7.1)                     | 46.6 (3.8)   | 8.4 (8.1)                |                           | 60.5 (10)             | 62.5 (6.1)   | 2 (11.7)                 |                           |
|                                        | Disparity % <sup>b</sup> (SE) | -19.1* (8.8)             | -7.2 (5.2)   |                          | 11.9 (10.2)               | -12.2 (7.4)                    | -8.7 (4.2)   |                          | 3.5 (8.5)                 | -7.4 (10)             | -7.2 (6.6)   |                          | 0.2 (12)                  |
| Native American/Alaska Native          | % <sup>a</sup> (SE)           | 41.5 (9)                 | 49.6 (11.9)  | 8.2 (14.9)               |                           | 24.2 (6.5)                     | 40.6 (22.3)  | 16.4 (11.5)              |                           | 91.4 (4.2)            | 57.6 (15.3)  | -33.8* (15.9)            |                           |
|                                        | Disparity % <sup>b</sup> (SE) | -16.2 (9)                | -13.6 (11.9) |                          | 2.6 (14.9)                | -26.2* (6.8)                   | -14.7 (9.4)  |                          | 11.5 (11.6)               | 23.4* (5)             | -12.2 (15.3) |                          | -35.6* (16.1)             |

Note:

\*indicates RR values with  $p < 0.05$ . We used data from 2005-2019 to examine treatment among adults with past-year major depressive episode or serious psychological distress, and 2008-2019 among adults with past-year severe mental illness. Results are shown for study start year (2005 for major depressive episode and serious psychological distress, 2008 for severe mental illness) and study end year (2019).

<sup>a</sup>Denotes p-values were derived from linear risk regression modeling differences between years within each racial/ethnic group. Bold values have  $p < 0.05$ .

<sup>b</sup>Denotes p-values were derived from linear risk regression for differences in trends between racial/ethnic minority group and whites. Bold values have  $p < 0.05$ .



Supplemental Figure 5. Prevalence of past-year any mental health treatment among adults 18 and older with major depressive episode by race and ethnicity, NSDUH 2005-2019

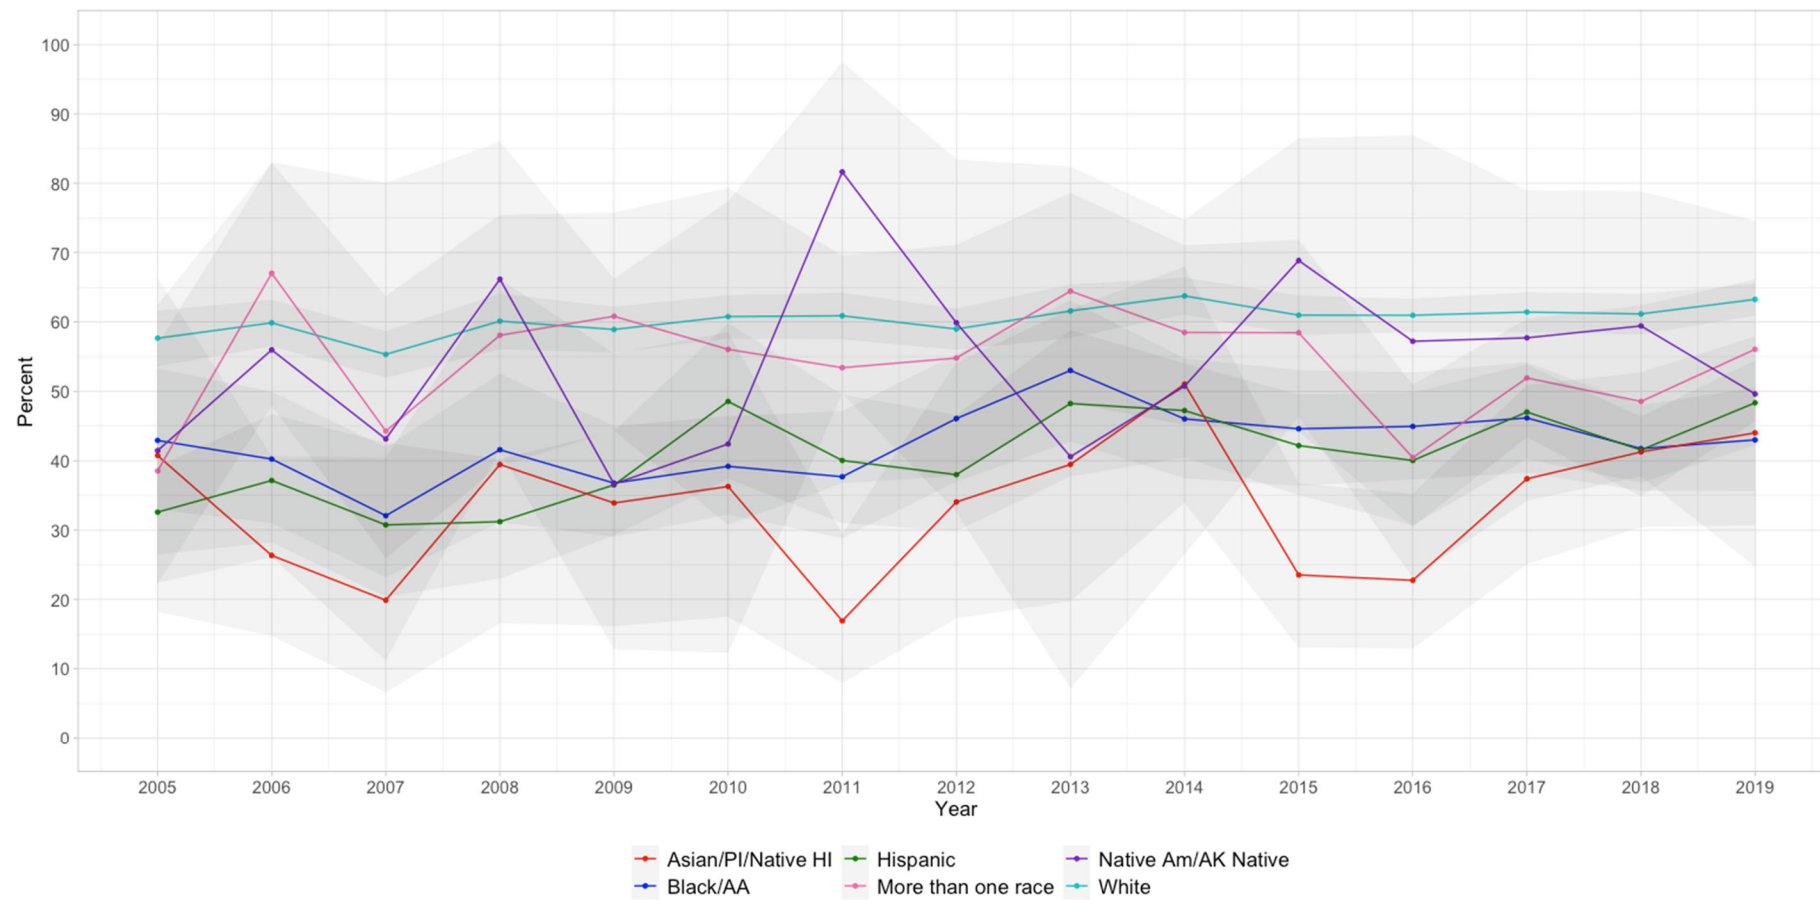

Note: The shading around the curves represents the 95% CI. Asian/Pacific Islander/Native Hawaiian (Asian/PI/Native HI), Black/African American (Black/AA), Native American/Alaska Native (Native Am/AK Native).

Supplemental Figure 6. Prevalence of past-year any mental health treatment among adults 18 and older with serious psychological distress by race and ethnicity, NSDUH 2005-2019

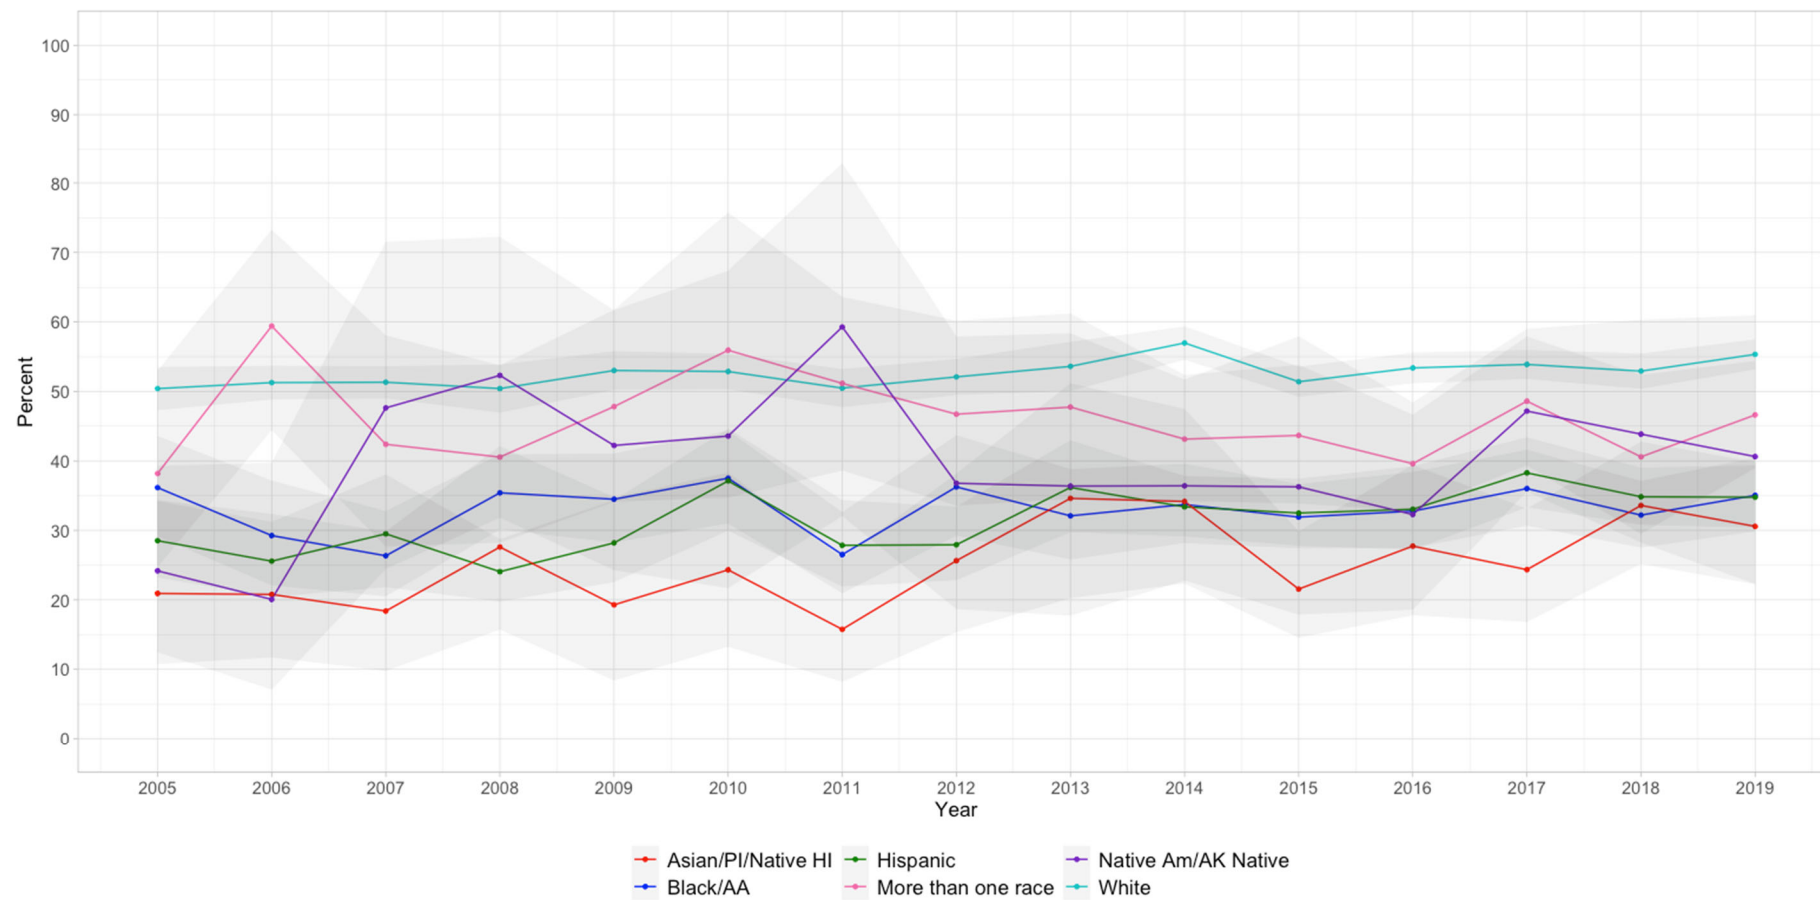

Note: The shading around the curves represents the 95% CI. Asian/Pacific Islander/Native Hawaiian (Asian/PI/Native HI), Black/African American (Black/AA), Native American/Alaska Native (Native Am/AK Native).

Supplemental Figure 7. Prevalence of past-year any mental health treatment among adults 18 and older with severe mental illness by race and ethnicity, NSDUH 2008-2019

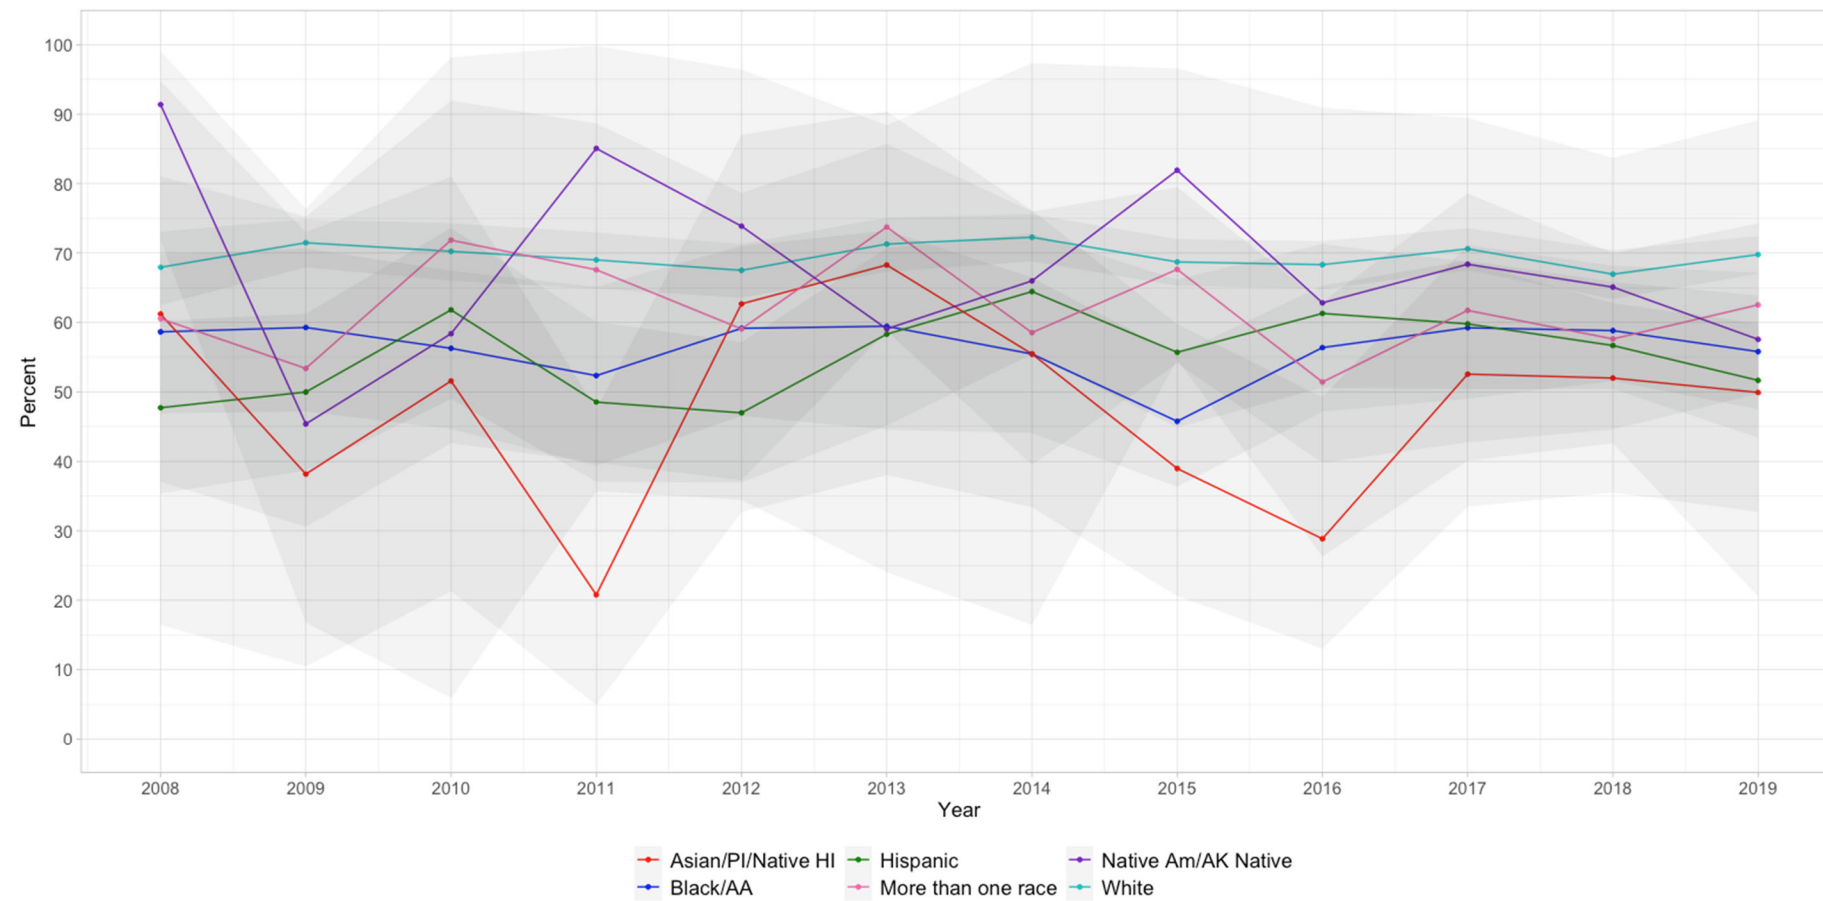

Note: The shading around the curves represents the 95% CI. Asian/Pacific Islander/Native Hawaiian (Asian/PI/Native HI), Black/African American (Black/AA), Native American/Alaska Native (Native Am/AK Native).
